# Supplementary material for: Impact of Fluoroalkylation on the n-Type Charge Transport of Two Naphthodithiophene Diimide Derivatives
Source: MDPI journal article supplement (doi:10.3390/molecules26144119), 2021-07-06
Supplement: s1 [file s1]

## Supplementary Materials

# Impact of fluoro-alkylation on the n-type charge transport of two naphthodithiophene-diimide derivatives

Gaetano Ricci<sup>1,2</sup>, Sofia Canola<sup>1,3</sup>, Yasi Dai<sup>1</sup>, Daniele Fazzi<sup>4,\*</sup> and Fabrizia Negri<sup>1,5,\*</sup>

<sup>1</sup> Dipartimento di Chimica “Giacomo Ciamician”, Università di Bologna, Via F. Selmi, 2, 40126 Bologna, Italy

<sup>2</sup> Present address: Unité de Chimie Physique Théorique et Structurale & Laboratoire de Physique du Solide, Namur Institute of Structured Matter, Université de Namur, B-5000, Namur, Belgium

<sup>3</sup> Present address: Institute of Physics of the Czech Academy of Sciences, Cukrovarnická 10/112, CZ16200 Praha 6, Czech Republic

<sup>4</sup> Institut für Physikalische Chemie, Department für Chemie, Universität zu Köln, Greinstr. 4-6, D-50939 Köln, Germany

<sup>5</sup> INSTM, UdR Bologna, Via F. Selmi, 2, 40126, Bologna, Italy

| TABLE OF CONTENTS                                                                                       | PAGE |
|---------------------------------------------------------------------------------------------------------|------|
| Computational details .....                                                                             | 3    |
| Table S1 – Total absolute and orbital energies .....                                                    | 5    |
| Table S2 – Relevant dimers for $\alpha$ -NDTI charge transport .....                                    | 5    |
| Table S3 – $\alpha$ -NDTI electronic couplings and MLJ charge transfer rate constants .....             | 6    |
| Table S4 - Relevant dimers for N-NDTI charge transport .....                                            | 6    |
| Table S5 – Absolute energies employed to evaluate $\lambda I$ (adiabatic potential method) .....        | 7    |
| Table S6 - Computed $\lambda I$ (adiabatic potential method) .....                                      | 7    |
| Table S7 – Effective parameters (MLJ rate constants) without the exclusion of classical modes .....     | 7    |
| Figure S1 – <i>ANTI-1</i> and <i>ANTI-2</i> orientations in $\alpha$ -NDTI and N-NDTI crystals .....    | 8    |
| Figure S2 – Frontier molecular orbitals of $\alpha$ -NDTI .....                                         | 9    |
| Figure S3 – Frontier molecular orbitals of N-NDTI .....                                                 | 10   |
| Figure S4 – Near-neighbours and possible charge transfer paths of $\alpha$ -NDTI .....                  | 11   |
| Figure S5 – The most effective charge transfer path P1 of $\alpha$ -NDTI .....                          | 11   |
| Figure S6 – Orientation of molecules in the N-NDTI crystal .....                                        | 12   |
| Figure S7 – Orbital overlap along the P1 path, in N-NDTI <i>ANTI-1</i> and <i>ANTI-2</i> crystals ..... | 13   |
| Figure S8 – The N-NDTI <i>mix</i> structure .....                                                       | 14   |
| Figure S9 – Bond length changes upon charging $\alpha$ -NDTI .....                                      | 15   |
| Figure S10 – Bond length changes upon charging N-NDTI .....                                             | 16   |
| Figure S11 – Huang-Rhys factors for N-NDTI .....                                                        | 17   |
| Figure S12 – Huang-Rhys factors for $\alpha$ -NDTI .....                                                | 17   |

|                                                                                     |    |
|-------------------------------------------------------------------------------------|----|
| Figure S13 – Low frequency intra-molecular modes of $\alpha$ -NDTI and N-NDTI ..... | 18 |
| Figure S14 – Charge carrier trajectories for $\alpha$ -NDTI.....                    | 19 |
| Figure S15– Charge carrier trajectories for N-NDTI.....                             | 20 |

## Computational details

### Dimensionless displacement parameters $B_m$ and Huang Rhys factors $S_m$ .

The  $B_m$  and  $S_m$  parameters, assuming the harmonic approximation and neglecting Duschinsky rotation, are defined as

$$B_m = \sqrt{\frac{\omega_m}{\hbar}} [X_k - X_j] M^{1/2} L_m(k) \quad (S1)$$

$$S_m = \frac{1}{2} B_m^2 \quad (S2)$$

where  $X_{k,j}$  is the  $3N$  dimensional vector of the equilibrium Cartesian coordinates of the  $k, j$ th state (here the pristine and oxidized/reduced molecular states),  $M$  is the  $3N \times 3N$  diagonal matrix of atomic masses and  $L_m(k)$  is the  $3N$  dimensional vector describing the  $m$ th normal coordinate of the  $k$ th state in terms of mass weighted Cartesian coordinates.

### Effective parameters in MLJ formulation.

In the MLJ rate constant formulation:

$$k_{eT} = \frac{2\pi}{\hbar} V_{ij}^2 \frac{1}{\sqrt{4\pi\lambda_{o+classic} k_B T}} \sum_{v=0}^{\infty} \left[ \exp(-S_{eff}) \frac{S_{eff}^v}{v!} \exp\left(-\frac{(\Delta G^0 + \lambda_{o+classic} + v\hbar\omega_{eff})^2}{4\lambda_{o+classic} k_B T}\right) \right] \quad (S3)$$

the effective vibrational frequency  $\omega_{eff}$ , was determined summing over all vibrational frequencies above  $200 \text{ cm}^{-1}$  (non-classical vibrations)

$$\omega_{eff} = \frac{\sum_{m(\omega_m > 200 \text{ cm}^{-1})} \omega_m S_m}{\sum_{n(\omega_n > 200 \text{ cm}^{-1})} S_n} \quad (S4)$$

and the associated effective HR factor,  $S_{eff}$ , was determined as

$$S_{eff} = \lambda_i / \hbar \omega_{eff} \quad (S5)$$

$$\lambda_i = \sum_{m(\omega_m > 200 \text{ cm}^{-1})} (\hbar \omega_m S_m) = \sum_{m(\omega_m > 200 \text{ cm}^{-1})} (\lambda_i^m) \quad (S6)$$

Note that the total intra-molecular reorganization energy computed by the adiabatic potential method can be recovered by eq. (S6) summing over all  $\lambda_i^m$  contributions including also those corresponding to frequencies below  $200 \text{ cm}^{-1}$ .

The outer sphere contribution was assumed to be  $0.01 \text{ eV}$ .  $\Delta G^0$  is the free energy associated with the self-exchange reaction ( $M_N + M_C \rightarrow M_C + M_N$  with  $M_N$  the molecule in the neutral state and  $M_C$  the molecule in the charge state) which in the frozen-core approximation can be written as the energy difference between the molecular orbitals localized on the molecules involved in the charge transfer (in this case LUMO). Since this energy difference is equal to zero for a self-exchange reaction,  $\Delta G^0 = -e\mathbf{F} \cdot \mathbf{d}$ , where  $\mathbf{F}$  is the electric field vector and  $\mathbf{d}$  the distance vector between the centres of mass of the molecules composing the dimer.

### Kinetic Monte Carlo simulations.

In each KMC simulation, a single charge carrier was let move on the crystal by hopping events occurring in a dimer. The probability associated with a hopping event which moves the charge carrier from site  $i$  to site  $j$ ,  $P_j$ , was determined by MLJ rate constant as  $P_j = k_j / \sum_n k_n$ , where  $n$  runs over all possible paths for a charge localized on a given molecular unit in the crystal. The time associated with a single hopping event is given by  $-\ln X / k_{TOT}$ , where  $X$  is a random number uniformly distributed between 0 and 1 and  $k_{TOT} = \sum_n k_n$ . The distance associated with the hopping is the distance between the centres of mass of the molecules involved in the charge transfer. A list of possible neighbours is available and the trajectory is advanced by choosing a random number  $r$  uniformly distributed between 0 and 1 and selecting the  $j$ -th neighbour such that  $\sum_n^{j-1} P_n < r \leq \sum_n^j P_n$ .

**Table S1 – Total absolute and orbital energies**

**Table S1.** Absolute energies, frontier orbital energies and H/L energy gaps of  $\alpha$ -NDTI and N-NDTI molecular structures extracted from crystal structure and at their optimized geometry (B3LYP/6-31G\*).

|                       | Absolute energy<br>[a.u.] | HOMO energy<br>[eV] | LUMO energy<br>[eV] | $\Delta E$ LUMO-HOMO<br>[eV] |
|-----------------------|---------------------------|---------------------|---------------------|------------------------------|
| <i>Crystal</i>        |                           |                     |                     |                              |
| $\alpha$ -NDTI ANTI-1 | -4930.387539              | -6.29               | -3.89               | 2.40                         |
| $\alpha$ -NDTI ANTI-2 | -4930.377615              | -6.37               | -3.82               | 2.55                         |
| <i>Optimized</i>      |                           |                     |                     |                              |
| $\alpha$ -NDTI ANTI-1 | -4931.012184              | -6.50               | -3.93               | 2.57                         |
| $\alpha$ -NDTI ANTI-2 | -4931.011819              | -6.50               | -3.94               | 2.57                         |
| <i>Crystal</i>        |                           |                     |                     |                              |
| N-NDTI ANTI-1         | -3600.066631              | -6.29               | -3.77               | 2.52                         |
| N-NDTI ANTI-2         | -3600.046489              | -6.30               | -3.69               | 2.61                         |
| <i>Optimized</i>      |                           |                     |                     |                              |
| N-NDTI ANTI-1         | -3600.219944              | -6.31               | -3.76               | 2.55                         |
| N-NDTI ANTI-2         | -3600.219935              | -6.31               | -3.76               | 2.55                         |

**Table S2 – Relevant dimers for  $\alpha$ -NDTI charge transport**

**Table S2.** Crystal of  $\alpha$ -NDTI: centre of mass distances for dimers involved in charge transport, vectorial components and identification with crystal axes. See also Figure S2.

| Dimer | Intermolecular<br>distance<br>(Å) | X<br>(Å) | Y<br>(Å) | Z<br>(Å) | Crystal<br>axis |
|-------|-----------------------------------|----------|----------|----------|-----------------|
| P1    | 6.654                             | 6.654    | 0        | 0        | <i>a</i>        |
| P1    | 6.654                             | -6.654   | 0        | 0        |                 |
| P2    | 13.569                            | -1.404   | -13.496  | 0        | <i>b</i>        |
| P2    | 13.569                            | 1.404    | 13.496   | 0        |                 |
| P3    | 14.481                            | 5.250    | -13.496  | 0        |                 |
| P3    | 14.481                            | -5.250   | 13.496   | 0        |                 |
| P4    | 14.640                            | -2.854   | -4.442   | -13.655  | <i>c</i>        |
| P4    | 14.640                            | 2.854    | 4.442    | 13.655   |                 |
| P5    | 15.719                            | 8.058    | 13.496   | 0        |                 |
| P5    | 15.719                            | -8.058   | -13.496  | 0        |                 |
| P6    | 16.448                            | 1.449    | -9.054   | 13.655   |                 |
| P6    | 16.448                            | -1.449   | 9.054    | -13.655  |                 |

**Table S3 –  $\alpha$ -NDTI electronic couplings and MLJ charge transfer rate constants**

**Table S3.** Centre of mass distances for dimers / charge hopping paths involved in charge transport, interplanar distances, electronic couplings (B3LYP/6-31G\*) between LUMO orbitals and MLJ rate constants computed for three crystalline structures:  $\alpha$ -NDTI *ANTI-1*, *ANTI-2* and *mix* (along the P1 path).

| Dimer / charge hopping path                   | Inter-molecular distance [Å] | Molecular plane distance [Å] | $V_{ij}^{\text{LUMO}}$ [meV] | $k_{\text{eT}}$ [ $\text{s}^{-1}$ ] |
|-----------------------------------------------|------------------------------|------------------------------|------------------------------|-------------------------------------|
| <b><math>\alpha</math>-NDTI <i>ANTI-1</i></b> |                              |                              |                              |                                     |
| P1                                            | 6.654                        | 3.646                        | 36                           | $5.62 \cdot 10^{12}$                |
| P2                                            | 13.569                       | 7.097                        | 0.029                        | $3.58 \cdot 10^6$                   |
| P3                                            | 14.481                       | 10.738                       | 0.004                        | $6.81 \cdot 10^4$                   |
| P4                                            | 14.640                       | 9.232                        | 0.017                        | $1.23 \cdot 10^6$                   |
| P5                                            | 15.719                       | 3.458                        | 0.032                        | $6.81 \cdot 10^4$                   |
| P6                                            | 16.448                       | 2.131                        | 0.032                        | $6.81 \cdot 10^4$                   |
| <b><math>\alpha</math>-NDTI <i>ANTI-2</i></b> |                              |                              |                              |                                     |
| P1                                            | 6.654                        | 3.646                        | 40                           | $6.88 \cdot 10^{12}$                |
| P2                                            | 13.569                       | 7.097                        | 0.021                        | $1.90 \cdot 10^6$                   |
| P3                                            | 14.481                       | 10.738                       | 0.005                        | $1.08 \cdot 10^5$                   |
| P4                                            | 14.640                       | 9.232                        | 0.022                        | $2.08 \cdot 10^6$                   |
| P5                                            | 15.719                       | 3.458                        | 0.002                        | $1.72 \cdot 10^4$                   |
| P6                                            | 16.448                       | 2.131                        | 0.010                        | $4.30 \cdot 10^5$                   |
| <b><math>\alpha</math>-NDTI <i>mix</i></b>    |                              |                              |                              |                                     |
| P1                                            | 6.654                        | 3.646                        | 38                           | /                                   |

**Table S4 - Relevant dimers for N-NDTI charge transport**

**Table S4.** Crystal of N-NDTI: centre of mass distances for dimers involved in charge transport, vectorial components and identification with crystal axes. See also Figure S4 and Figure 3.

| Dimer | Intermolecular distance (Å) | X (Å)  | Y (Å)   | Z (Å)  | Crystal axis |
|-------|-----------------------------|--------|---------|--------|--------------|
| P1    | 4.197                       | -0.227 | 0.562   | 4.153  | $\approx c$  |
| P1    | 4.197                       | 0.227  | 0.562   | -4.153 |              |
| P2    | 11.002                      | 0      | -11.002 | 0      | $b$          |
| P2    | 11.002                      | 0      | 11.002  | 0      |              |
| P3    | 11.238                      | 0.227  | -10.440 | -4.153 |              |
| P3    | 11.238                      | -0.227 | -10.440 | 4.153  |              |
| P4    | 12.290                      | 0.227  | 11.564  | -4.153 |              |
| P4    | 12.290                      | -0.227 | 11.564  | 4.153  |              |

**Table S5 – Absolute energies employed to evaluate  $\lambda_i$  (adiabatic potential method)**

**Table S5.** Absolute energies (B3LYP/6-31G\*) of the neutral species at the neutral geometry  $E_n^{\text{geo-n}}$ , of the charged species at the charged geometry  $E_a^{\text{geo-a}}$ , of the neutral species at the charged geometry  $E_n^{\text{geo-a}}$  and of the charged species at the neutral geometry  $E_a^{\text{geo-n}}$  of  **$\alpha$ -NDTI** (two conformers determined by geometry optimization of *ANTI*-1 and *ANTI*-2 crystal structures) and **N-NDTI**.

|                                 | $E_n^{\text{geo-n}}$<br>[a.u.] | $E_a^{\text{geo-a}}$<br>[a.u.] | $E_n^{\text{geo-a}}$<br>[a.u.] | $E_a^{\text{geo-n}}$<br>[a.u.] |
|---------------------------------|--------------------------------|--------------------------------|--------------------------------|--------------------------------|
| <b><math>\alpha</math>-NDTI</b> |                                |                                |                                |                                |
| <i>ANTI</i> -1                  | -4931.012184                   | -4931.119766                   | -4931.006368                   | -4931.113835                   |
| <i>ANTI</i> -2                  | -4931.011819                   | -4931.119512                   | -4931.006014                   | -4931.113592                   |
| <b>N-NDTI</b>                   | -3600.219944                   | -3600.314781                   | -3600.214365                   | -3600.309147                   |

**Table S6 - Computed  $\lambda_i$  (adiabatic potential method)**

**Table S6.** Intra-molecular reorganization energies  $\lambda_i$  of  **$\alpha$ -NDTI** (two conformers) and **N-NDTI** evaluated with the adiabatic potential method at B3LYP/6-31G\* level.

|                                 | $\lambda_i^{\text{n}} = E_n^{\text{geo-a}} - E_n^{\text{geo-n}}$<br>[eV] | $\lambda_i^{\text{a}} = E_a^{\text{geo-n}} - E_a^{\text{geo-a}}$<br>[eV] | $\lambda_i = \lambda_i^{\text{n}} + \lambda_i^{\text{a}}$<br>[eV] |
|---------------------------------|--------------------------------------------------------------------------|--------------------------------------------------------------------------|-------------------------------------------------------------------|
| <b><math>\alpha</math>-NDTI</b> |                                                                          |                                                                          |                                                                   |
| <i>ANTI</i> -1                  | 0.158                                                                    | 0.161                                                                    | 0.319                                                             |
| <i>ANTI</i> -2                  | 0.158                                                                    | 0.161                                                                    | 0.319                                                             |
| <b>N-NDTI</b>                   | 0.152                                                                    | 0.153                                                                    | 0.305                                                             |

**Table S7 – Effective parameters (MLJ rate constants) without the exclusion of classical modes**

**Table S7:** Reorganization energies  $\lambda_i$ , effective parameters (frequencies  $\omega_{\text{eff}}$ , HR factors  $S_{\text{eff}}$ ) and contributions from intra-molecular classical vibrations  $\lambda_{\text{classic}}$ , for  **$\alpha$ -NDTI** and **N-NDTI**, determined including the entire set of computed molecular vibrations.

|                                               | $\lambda_i$<br>[eV] | $\omega_{\text{eff}}$<br>[cm <sup>-1</sup> ] | $S_{\text{eff}}$ | $\lambda_{\text{classic}}$<br>[eV] | $\lambda_o$<br>[eV] |
|-----------------------------------------------|---------------------|----------------------------------------------|------------------|------------------------------------|---------------------|
| <b><math>\alpha</math>-NDTI <i>ANTI</i>-1</b> | 0.318               | 445                                          | 5.778            | 0                                  | 0.01                |
| <b><math>\alpha</math>-NDTI <i>ANTI</i>-2</b> | 0.319               | 427                                          | 6.017            | 0                                  | 0.01                |
| <b>N-NDTI</b>                                 | 0.305               | 468                                          | 5.253            | 0                                  | 0.01                |

Figure S1 – *ANTI-1* and *ANTI-2* orientations in  $\alpha$ -NDTI and N-NDTI crystals

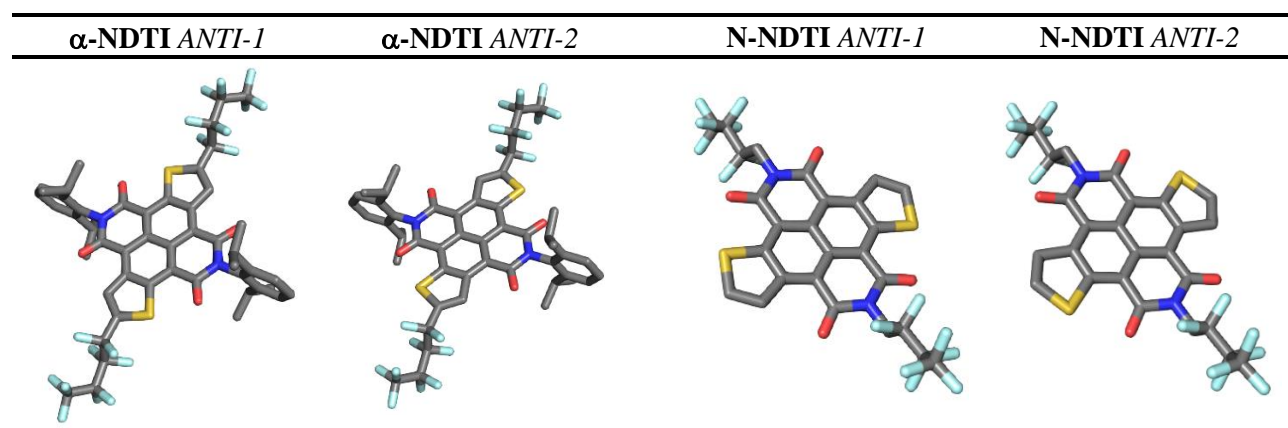

**Figure S1.** Crystallographic disorder: the two structures of  $\alpha$ -NDTI and N-NDTI characterized by a different orientation of thiophene groups.



Figure S2 – Frontier molecular orbitals of  $\alpha$ -NDTI

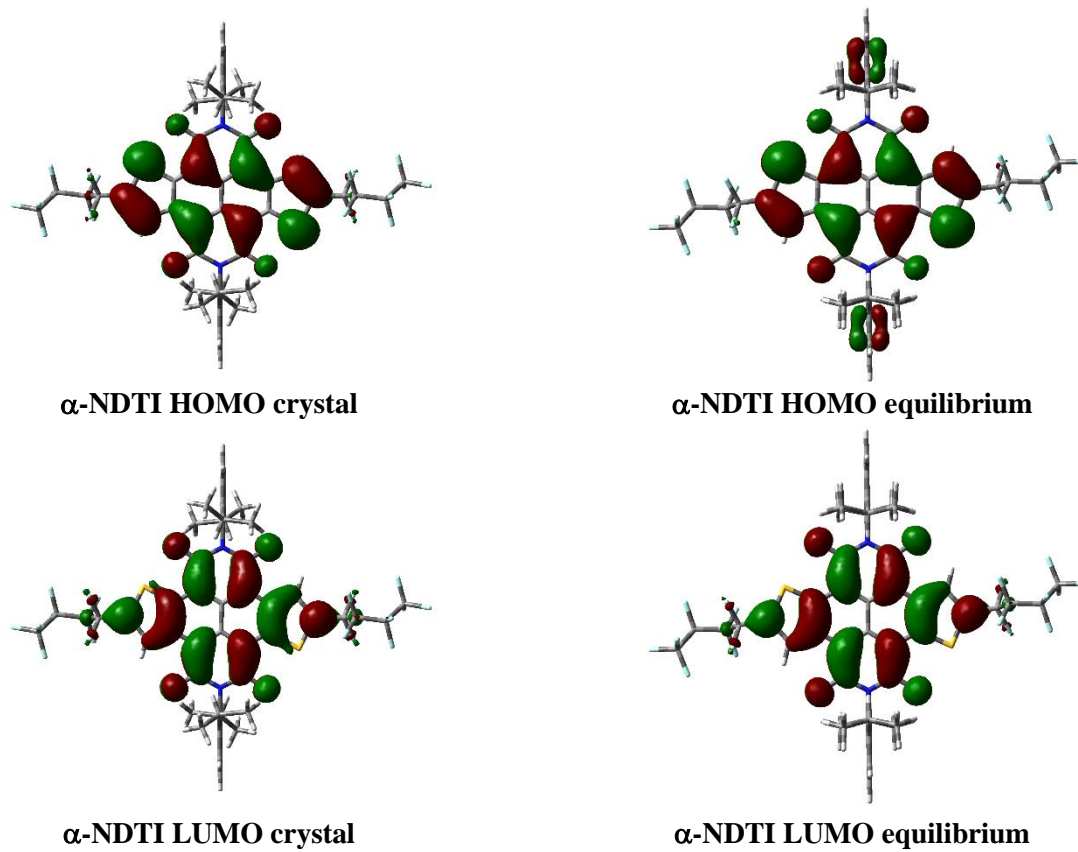

**Figure S2.** HOMO and LUMO orbitals of  $\alpha$ -NDTI *ANTI-1* at the crystal geometry (left) and at the B3LYP/6-31G\* computed equilibrium geometry (right).

Figure S3 – Frontier molecular orbitals of N-NDTI

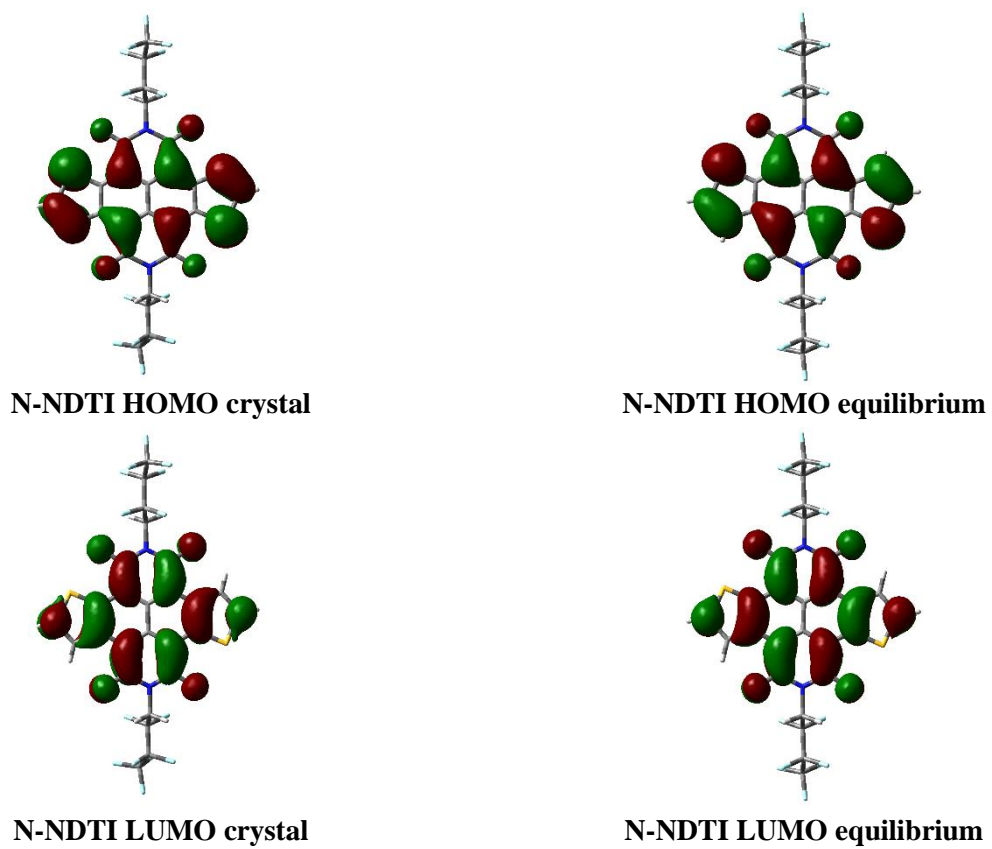

**Figure S3:** HOMO and LUMO orbitals of **N-NDTI** *ANTI-1* at the crystal geometry (left) and at the B3LYP/6-31G\* computed equilibrium geometry (right).

Figure S4 – Near-neighbours and possible charge transfer paths of  $\alpha$ -NDTI

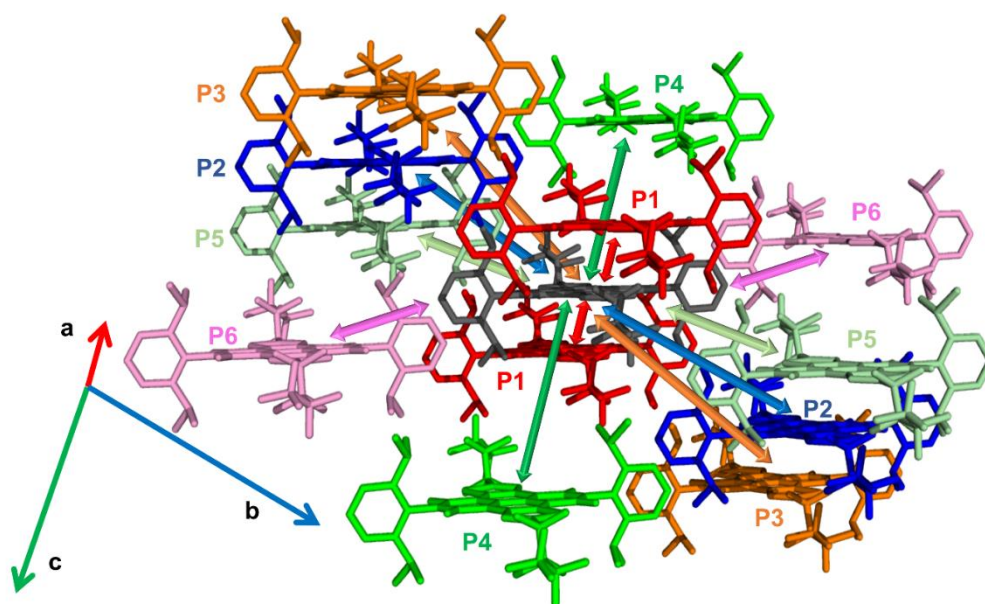

Figure S4. Crystal of  $\alpha$ -NDTI: The possible charge transport paths taking as reference the central molecule (black). Only P1 is associated with a non-negligible electronic coupling.

Figure S5 – The most effective charge transfer path P1 of  $\alpha$ -NDTI

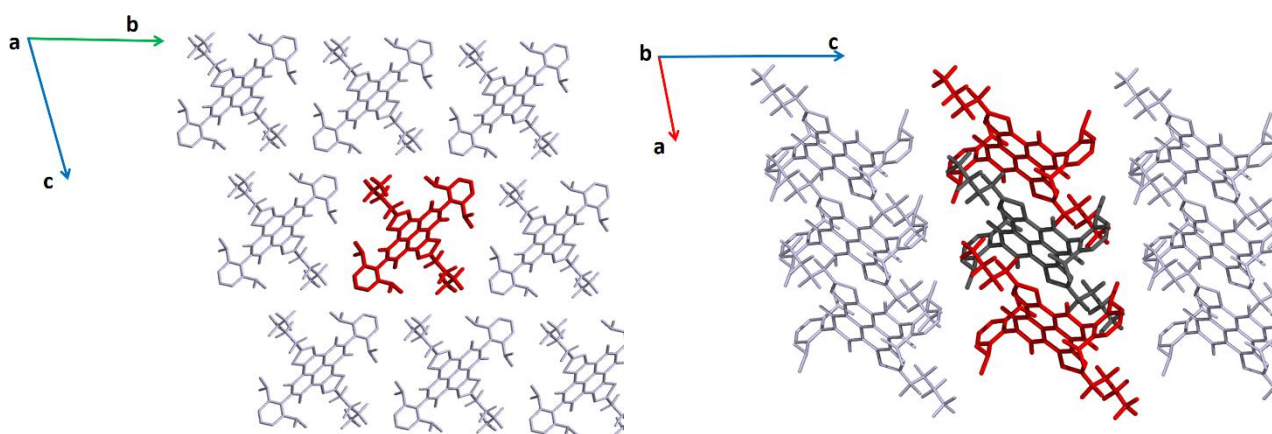

Figure S5. Crystal of  $\alpha$ -NDTI: view of the P1 charge transfer path along the  $a$  and  $b$  crystal axes.

Figure S6 – Orientation of molecules in the N-NDTI crystal

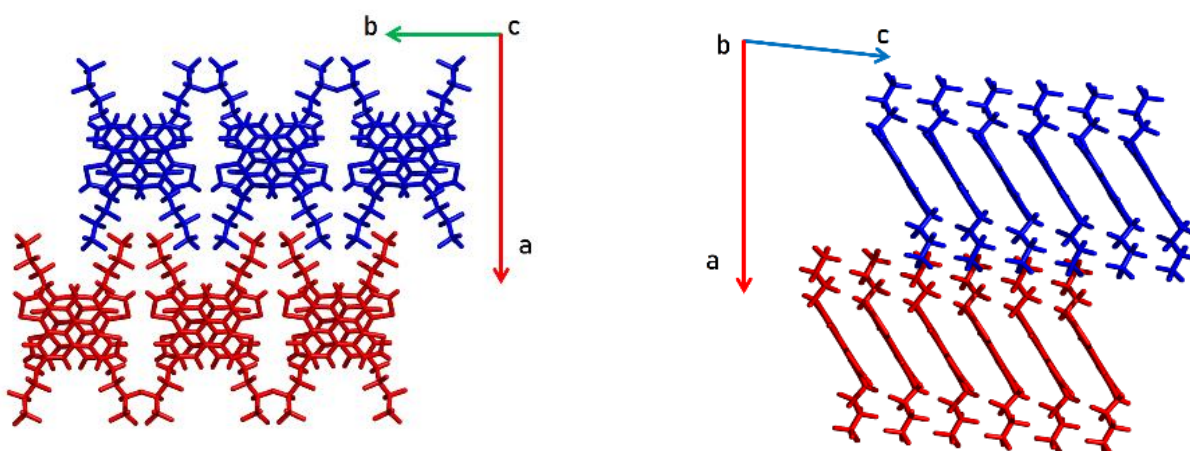

**Figure S6.** Crystal structure of **N-NDTI** showing layers of molecules arranged along the *c* axis and parallel to the *ac* plane. Views along the *c* and *b* crystal axes. Charge transfer integrals from the blue to the red layers are almost negligible owing to the large distance between molecules and negligible orbital overlap.

Figure S7 – Orbital overlap along the P1 path, in N-NDTI *ANTI-1* and *ANTI-2* crystals

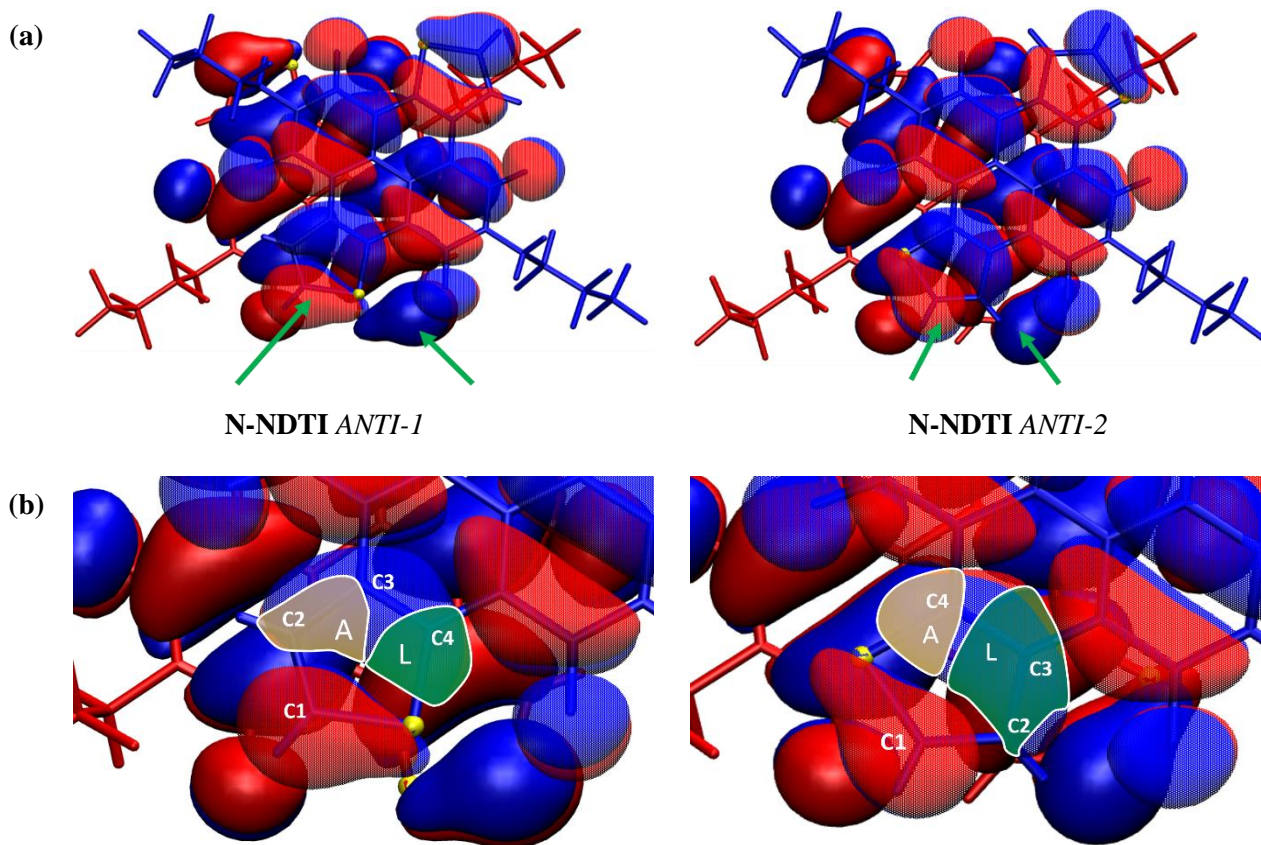

**Figure S7.** LUMO orbital overlap along the P1 charge transfer path of **N-NDTI**. The structure of the two molecules forming a P1 dimer are drawn in red and blue. (a) **N-NDTI** *ANTI-1* (left) and **N-NDTI** *ANTI-2* (right); (b) zoom view of the thiophene moieties indicated by green arrows in (a). C1, C2, C3 and C4 indicate the molecular moiety participating to major changes in LUMO overlaps in turn determining different computed electronic couplings for *ANTI-1* (smaller overall overlap,  $V_{ij}$ =35 meV) and *ANTI-2* (larger overall overlap,  $V_{ij}$ =50 meV) crystals. Yellow surfaces (A label) indicate regions of ‘antibonding’ overlap, while green surfaces (L label) indicate regions of ‘bonding’ overlap.



Figure S8 – The N-NDTI *mix* structure

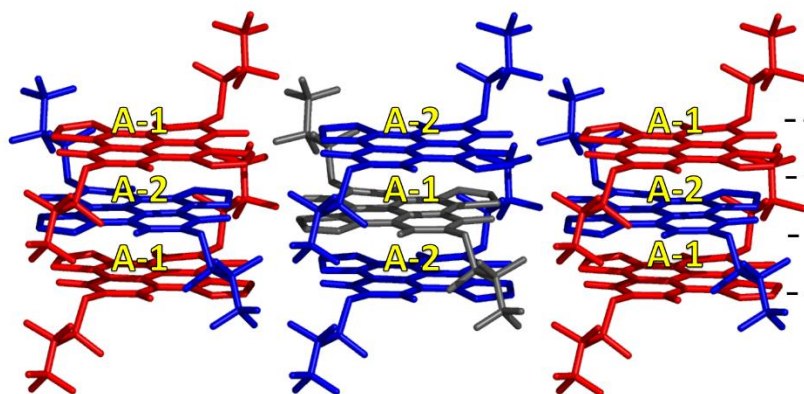

**Figure S8:** The N-NDTI *mix* crystal including both thiophene orientations *ANTI-1* (A-1) and *ANTI-2* (A-2) in equal proportions.

Figure S9 – Bond length changes upon charging  $\alpha$ -NDTI

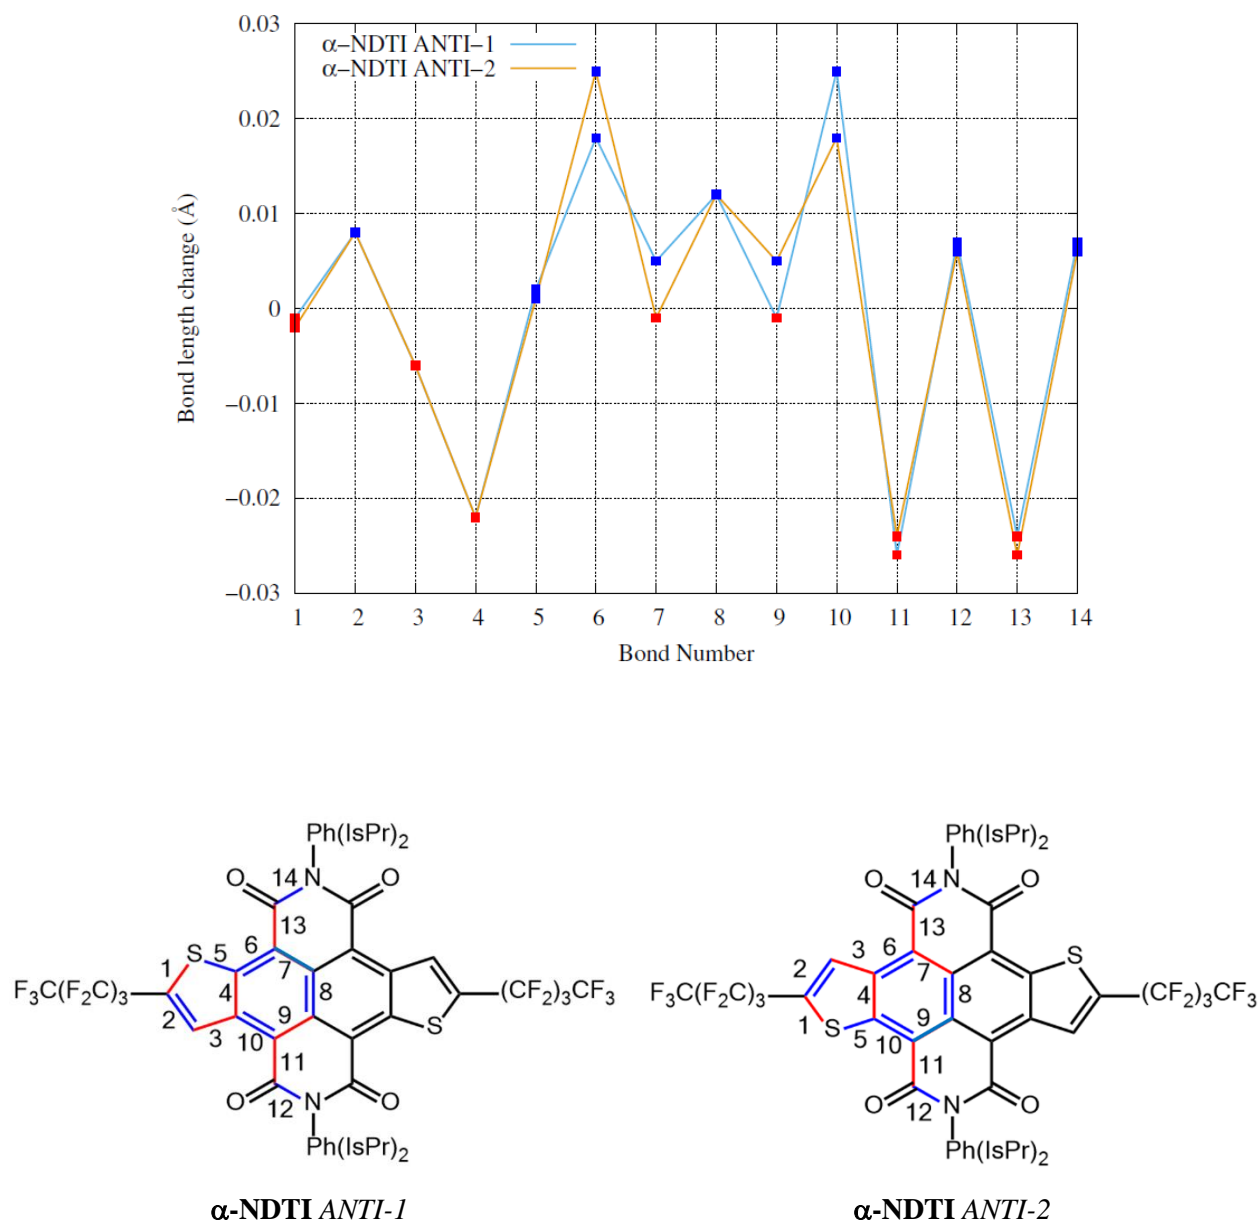

Figure S9.  $\alpha$ -NDTI computed bond length (BL) changes upon charging (BL(anion) - BL(neutral)) (B3LYP/6-31G\*) for  $\alpha$ -NDTI ANTI-1 (cyan) and ANTI-2 (orange).

**Figure S10 – Bond length changes upon charging N-NDTI**

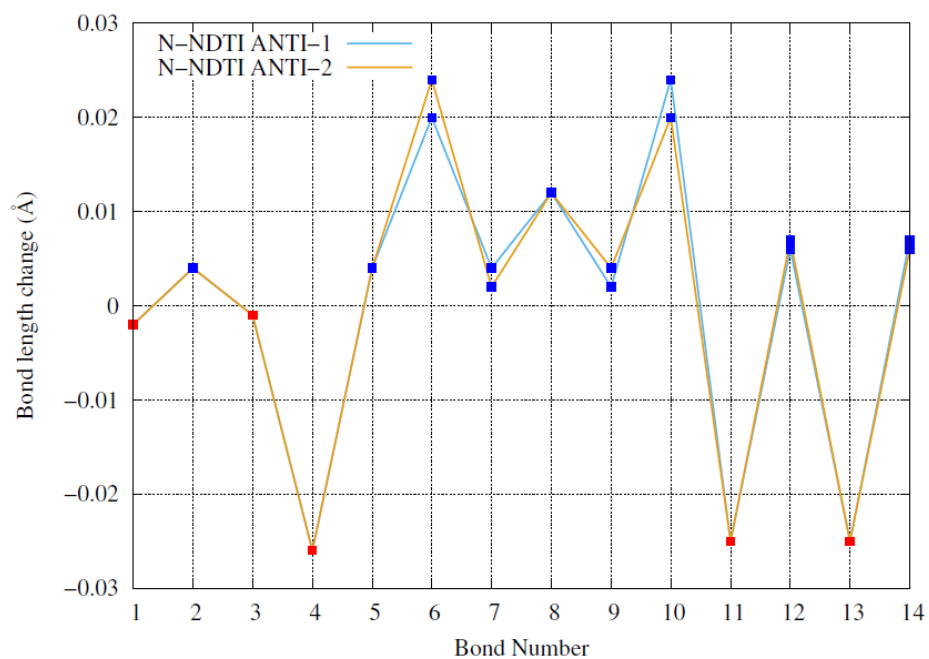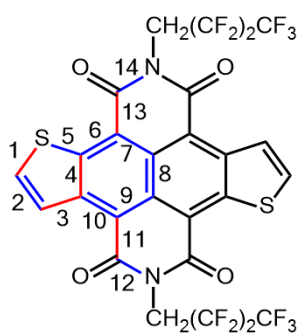

**N-NDTI ANTI-1**

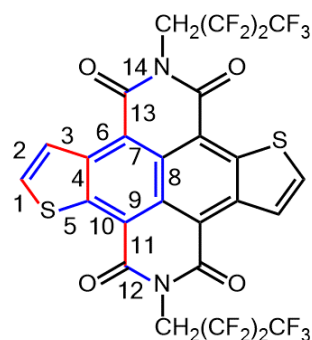

**N-NDTI ANTI-2**

**Figure S10.** N-NDTI computed bond length (BL) changes upon charging (BL(anion) - BL(neutral)) (B3LYP/6-31G\*) for N-NDTI ANTI-1 (cyan) and ANTI-2 (orange).



Figure S11 – Huang-Rhys factors for N-NDTI

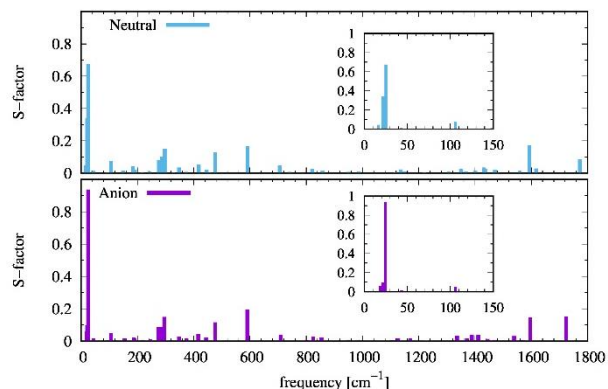

**Figure S11.** HR factors  $S_m$  (B3LYP/6-31G\*) associated with the vibrational modes  $m$  of neutral and charged species of **N-NDTI**. The graph shows that largest HR factor is computed for a vibrational frequency below 50  $\text{cm}^{-1}$ .

Figure S12 – Huang-Rhys factors for  $\alpha$ -NDTI

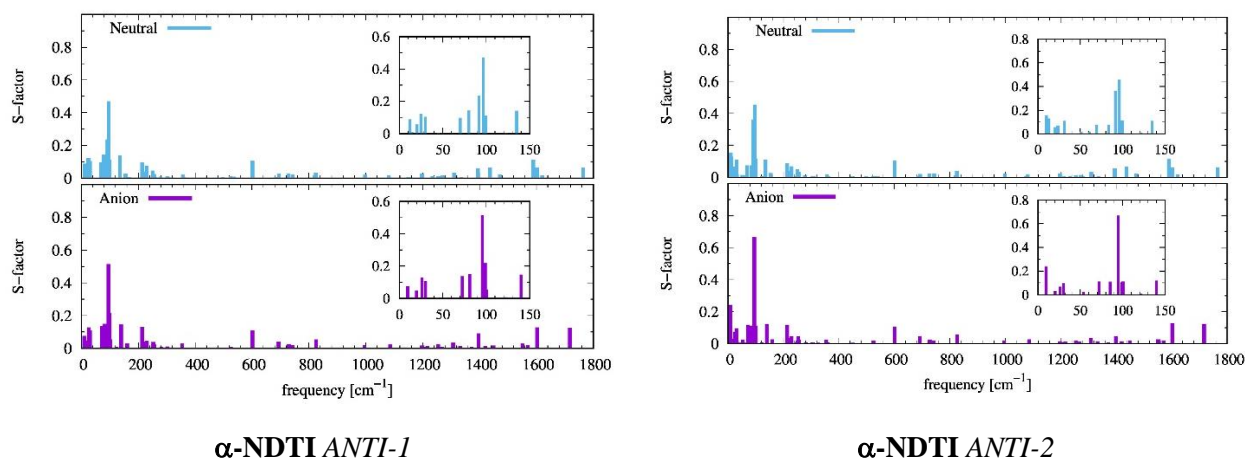

**Figure S12.**  $\alpha$ -NDTI: HR factors  $S_m$  (B3LYP/6-31G\*) associated with the vibrational modes  $m$  of neutral and charged species of *ANTI-1* and *ANTI-2*. For both conformers, the graph shows that the largest HR factor is computed for a vibrational frequency below 100  $\text{cm}^{-1}$ .

Figure S13 – Low frequency intra-molecular modes of  $\alpha$ -NDTI and N-NDTI

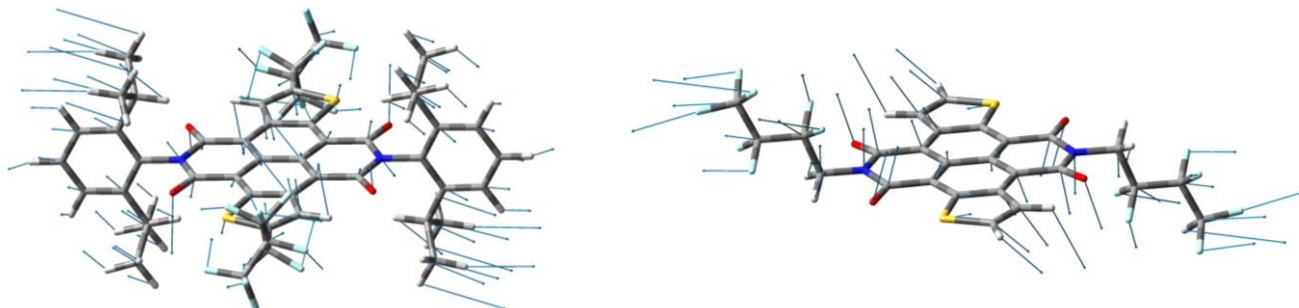

**Figure S13.** Visualization of the accordion-like normal modes of  $\alpha$ -NDTI (left) at  $96\text{ cm}^{-1}$  and of N-NDTI (right) at  $25\text{ cm}^{-1}$  associated with large HR factors.

**Figure S14 – Charge carrier trajectories for  $\alpha$ -NDTI**

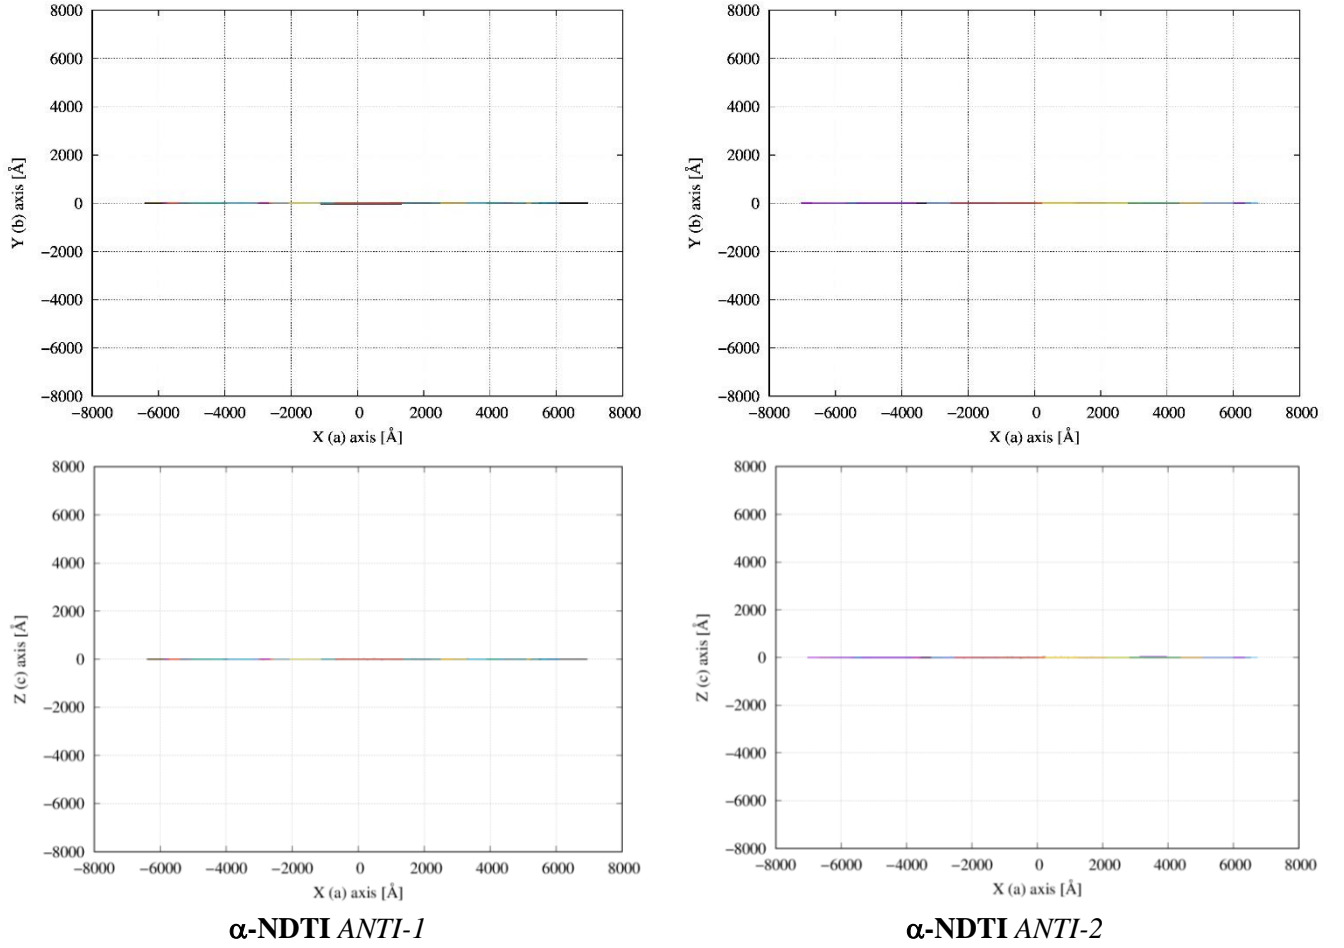

**Figure S14:** KMC brownian trajectories of the charge carrier computed for  $\alpha$ -NDTI *ANTI-1* and *ANTI-2* and projected on (top) the X,Y plane (*a,b* crystallographic plane) and (bottom) the X,Z plane (*a,c* crystallographic plane). For both crystal structures the charge transport is 1D along the *a* axis.

**Figure S15–** Charge carrier trajectories for N-NDTI

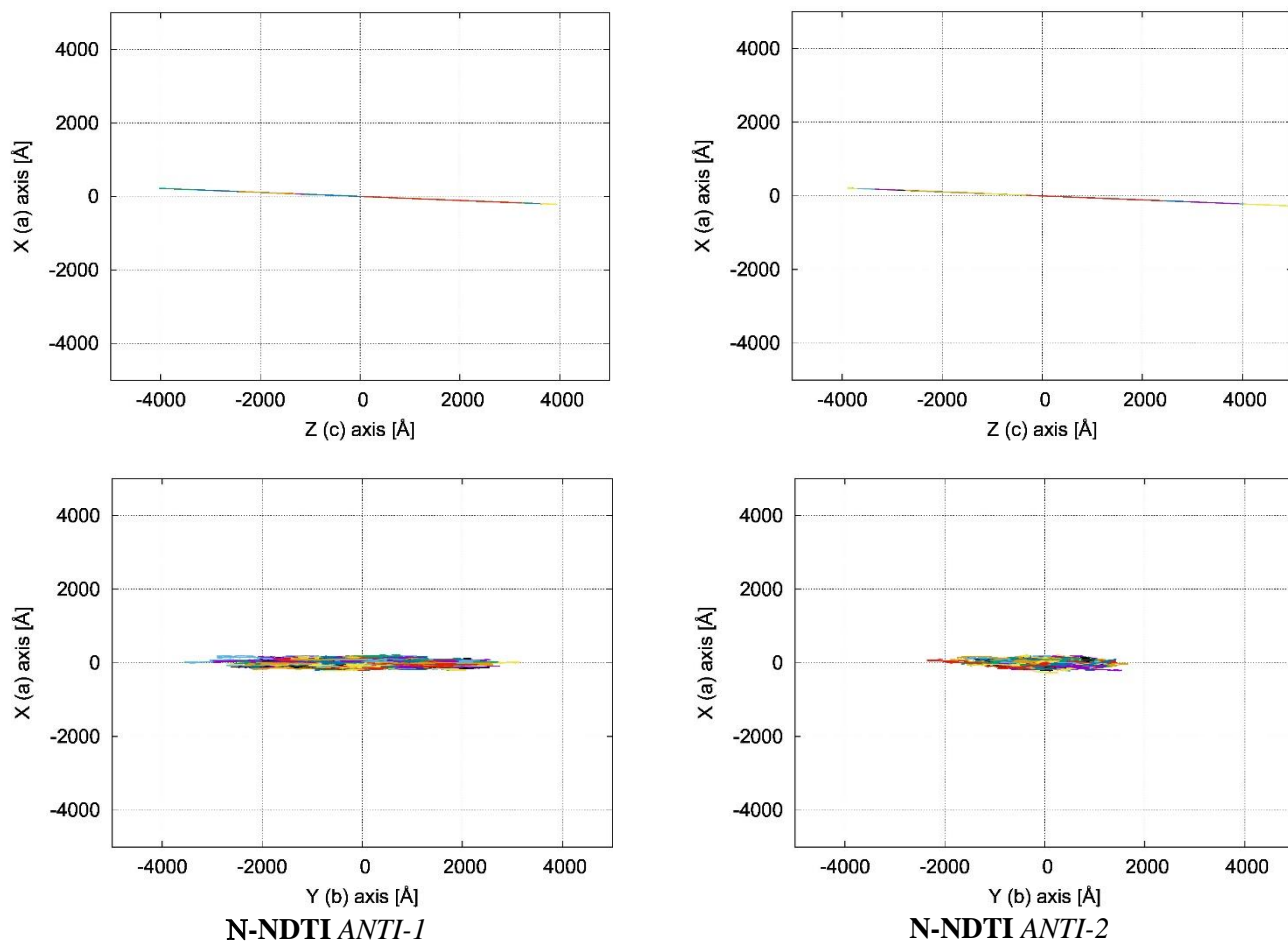

**Figure S15.** KMC brownian trajectories of the charge carrier computed for **N-NDTI ANTI-1** and **ANTI-2** and projected on: (top) the X,Z plane ( $a,c$  crystallographic plane) and (bottom) the X,Y plane ( $a,b$  crystallographic plane). For both crystal structures the charge transport is bidimensional in the  $b,c$  plane.
